# Supplementary material for: High genetic diversity, phenotypic plasticity, and invasive potential of a recently introduced calcareous sponge, fast spreading across the Atlanto-Mediterranean basin
Source: PubMed Central journal article supplement (PMC4851981; doi:10.1007/s00227-016-2862-6), 2016-04-30
Supplement: 227_2016_2862_MOESM1_ESM.pdf [file 227_2016_2862_MOESM1_ESM.pdf]

**High genetic diversity, phenotypic plasticity, and invasive potential of a recently introduced calcareous sponge, fast spreading across the Atlanto-Mediterranean basin.**

Magdalena Guardiola<sup>1</sup>, Johanna Frotscher<sup>2</sup>, Maria-J. Uriz<sup>1\*</sup>

<sup>1</sup> Centre d'Estudis Avançats de Blanes (CEAB-CSIC). Accés Cala St Francesc, 14. 17300 Blanes, Girona, Spain

<sup>2</sup> Geisenheim University, Department of Grape Breeding, 65366 Geisenheim, Germany

\* Corresponding author: iosune@ceab.csic.es

Table S1. Allele frequencies. Frequencies of private alleles in bold.

|              | BLN   | EST   | PLL          | CGA          | CPA          | LHE   | FLR   | SGR   | MAD   | BRZ   |
|--------------|-------|-------|--------------|--------------|--------------|-------|-------|-------|-------|-------|
| <b>cal_a</b> |       |       |              |              |              |       |       |       |       |       |
| <b>170</b>   | -     | 0.050 | 0.020        | 0.083        | 0.018        | 0.038 | 0.018 | 0.111 | 0.020 | -     |
| <b>171</b>   | 0.018 | 0.200 | 0.180        | 0.050        | 0.107        | 0.308 | -     | 0.185 | 0.040 | -     |
| <b>172</b>   | -     | -     | <b>0.100</b> | -            | -            | -     | -     | -     | -     | -     |
| <b>178</b>   | 0.357 | 0.450 | 0.200        | 0.267        | 0.446        | 0.231 | 0.089 | 0.370 | 0.200 | 0.400 |
| <b>180</b>   | 0.536 | 0.025 | 0.060        | 0.083        | 0.089        | 0.269 | 0.286 | 0.111 | 0.400 | 0.250 |
| <b>182</b>   | -     | 0.050 | 0.040        | 0.150        | 0.107        | -     | 0.321 | 0.037 | 0.120 | 0.050 |
| <b>183</b>   | -     | 0.125 | -            | 0.083        | -            | -     | 0.036 | 0.056 | 0.020 | -     |
| <b>184</b>   | -     | 0.025 | 0.140        | 0.050        | -            | -     | -     | 0.056 | -     | -     |
| <b>185</b>   | -     | -     | -            | <b>0.017</b> | -            | -     | -     | -     | -     | -     |
| <b>186</b>   | -     | -     | <b>0.100</b> | -            | -            | -     | -     | -     | -     | -     |
| <b>187</b>   | -     | -     | -            | -            | <b>0.018</b> | -     | -     | -     | -     | -     |
| <b>188</b>   | 0.018 | 0.075 | 0.060        | -            | 0.125        | -     | 0.036 | 0.019 | -     | 0.100 |
| <b>190</b>   | -     | -     | -            | -            | 0.018        | -     | -     | -     | -     | 0.050 |
| <b>192</b>   | 0.018 | -     | 0.020        | 0.217        | 0.054        | 0.154 | 0.214 | 0.037 | 0.160 | 0.150 |
| <b>194</b>   | 0.054 | -     | 0.080        | -            | -            | -     | -     | -     | -     | -     |

|              |       |       |              |              |              |       |       |              |              |       |
|--------------|-------|-------|--------------|--------------|--------------|-------|-------|--------------|--------------|-------|
| 196          | -     | -     | -            | -            | <b>0.018</b> | -     | -     | -            | -            | -     |
| 197          | -     | -     | -            | -            | -            | -     | -     | <b>0.019</b> | -            | -     |
| 198          | -     | -     | -            | -            | -            | -     | -     | -            | <b>0.040</b> | -     |
| <b>cal_b</b> |       |       |              |              |              |       |       |              |              |       |
| 247          | 0.018 | -     | 0.019        | -            | 0.018        | -     | -     | -            | -            | -     |
| 250          | 0.054 | -     | -            | -            | 0.036        | -     | 0.065 | 0.052        | 0.204        | 0.167 |
| 251          | -     | 0.079 | -            | -            | -            | -     | -     | 0.034        | -            | 0.028 |
| 254          | 0.107 | 0.079 | -            | 0.19         | 0.196        | -     | 0.196 | 0.138        | 0.037        | -     |
| 255          | -     | 0.053 | -            | -            | -            | -     | 0.043 | 0.052        | -            | -     |
| 256          | -     | -     | -            | -            | <b>0.018</b> | -     | -     | -            | -            | -     |
| 257          | 0.339 | 0.447 | 0.407        | 0.483        | 0.321        | 0.808 | 0.087 | 0.155        | 0.074        | 0.5   |
| 258          | 0.214 | 0.132 | 0.241        | -            | 0.018        | -     | 0.109 | 0.121        | 0.148        | 0.278 |
| 259          | -     | -     | -            | 0.017        | 0.018        | -     | -     | -            | 0.019        | -     |
| 262          | 0.054 | -     | 0.056        | 0.052        | 0.054        | -     | 0.022 | 0.017        | -            | 0.028 |
| 269          | -     | -     | 0.093        | 0.086        | 0.018        | -     | 0.13  | 0.052        | 0.148        | -     |
| 270          | 0.214 | 0.211 | 0.111        | 0.172        | 0.304        | 0.192 | 0.348 | 0.379        | 0.37         | -     |
| 289          | -     | -     | <b>0.074</b> | -            | -            | -     | -     | -            | -            | -     |
| <b>cal_c</b> |       |       |              |              |              |       |       |              |              |       |
| 145          | -     | 0.038 | 0.037        | 0.103        | 0.036        | 0.071 | 0.179 | 0.117        | 0.542        | 0.028 |
| 147          | 0.696 | 0.885 | 0.778        | 0.69         | 0.518        | 0.857 | 0.625 | 0.667        | 0.438        | 0.528 |
| 149          | 0.304 | 0.077 | 0.185        | 0.155        | 0.446        | 0.071 | 0.196 | 0.217        | 0.021        | 0.444 |
| 155          | -     | -     | -            | <b>0.052</b> | -            | -     | -     | -            | -            | -     |
| <b>cal_d</b> |       |       |              |              |              |       |       |              |              |       |
| 180          | 0.043 | -     | 0.263        | 0.065        | 0.259        | -     | 0.065 | 0.109        | 0.040        | 0.600 |
| 181          | -     | -     | -            | 0.087        | 0.148        | -     | -     | -            | -            | -     |
| 182          | -     | -     | -            | -            | <b>0.037</b> | -     | -     | -            | -            | -     |
| 183          | 0.152 | 0.105 | -            | 0.261        | 0.074        | -     | 0.130 | 0.043        | -            | 0.067 |
| 184          | 0.370 | 0.500 | 0.105        | 0.130        | 0.333        | 0.100 | 0.022 | 0.261        | -            | -     |
| 185          | -     | -     | -            | -            | 0.037        | 0.100 | -     | -            | -            | -     |
| 187          | -     | -     | -            | 0.022        | -            | -     | -     | 0.109        | -            | -     |
| 188          | -     | -     | -            | -            | -            | -     | -     | 0.043        | 0.020        | -     |
| 191          | 0.217 | 0.289 | 0.053        | 0.065        | -            | 0.150 | 0.065 | 0.152        | 0.380        | -     |

---

|     |              |       |              |              |       |       |       |              |       |       |
|-----|--------------|-------|--------------|--------------|-------|-------|-------|--------------|-------|-------|
| 192 | -            | -     | -            | -            | -     | -     | 0.043 | 0.043        | -     | -     |
| 193 | -            | -     | -            | -            | -     | -     | -     | <b>0.022</b> | -     | -     |
| 197 | -            | -     | <b>0.289</b> | -            | -     | -     | -     | -            | -     | -     |
| 199 | 0.022        | -     | 0.053        | 0.043        | -     | 0.100 | -     | -            | -     | 0.100 |
| 200 | -            | -     | -            | 0.043        | 0.037 | -     | -     | -            | -     | -     |
| 201 | -            | -     | 0.105        | -            | -     | 0.100 | 0.022 | -            | 0.020 | 0.100 |
| 202 | -            | -     | -            | 0.043        | -     | -     | 0.022 | 0.043        | -     | -     |
| 203 | 0.130        | 0.105 | 0.053        | 0.130        | 0.074 | 0.450 | 0.609 | 0.130        | 0.540 | -     |
| 204 | -            | -     | -            | <b>0.022</b> | -     | -     | -     | -            | -     | -     |
| 205 | <b>0.065</b> | -     | -            | -            | -     | -     | -     | -            | -     | -     |
| 207 | -            | -     | -            | 0.087        | -     | -     | 0.022 | 0.043        | -     | 0.133 |
| 213 | -            | -     | <b>0.079</b> | -            | -     | -     | -     | -            | -     | -     |

cal\_e

|     |       |       |       |       |       |       |       |       |       |       |
|-----|-------|-------|-------|-------|-------|-------|-------|-------|-------|-------|
| 165 | 0.067 | 0.058 | 0.056 | 0.083 | 0.224 | 0.115 | 0.185 | 0.150 | 0.020 | 0.029 |
| 167 | 0.233 | 0.250 | 0.278 | 0.217 | 0.069 | 0.231 | 0.167 | 0.217 | 0.160 | 0.206 |
| 169 | 0.333 | 0.442 | 0.370 | 0.350 | 0.224 | 0.269 | 0.352 | 0.333 | 0.560 | 0.529 |
| 171 | 0.033 | 0.019 | -     | 0.033 | 0.086 | -     | 0.019 | 0.017 | 0.080 | 0.029 |
| 173 | 0.100 | 0.154 | 0.241 | 0.100 | 0.172 | 0.308 | 0.093 | 0.133 | 0.060 | -     |
| 175 | 0.050 | 0.077 | 0.019 | 0.100 | 0.086 | 0.077 | 0.074 | 0.017 | -     | 0.147 |
| 177 | -     | -     | 0.037 | 0.017 | -     | -     | 0.037 | -     | 0.080 | 0.029 |
| 179 | 0.183 | -     | -     | 0.100 | 0.138 | -     | 0.074 | 0.133 | 0.040 | 0.029 |

cal\_f

|     |       |       |              |       |       |       |       |       |       |       |
|-----|-------|-------|--------------|-------|-------|-------|-------|-------|-------|-------|
| 135 | 0.333 | -     | 0.185        | 0.339 | 0.159 | 0.038 | 0.212 | 0.260 | 0.174 | 0.406 |
| 138 | -     | -     | -            | -     | -     | -     | 0.038 | 0.040 | -     | -     |
| 140 | -     | 0.024 | -            | 0.036 | -     | -     | 0.173 | 0.060 | -     | -     |
| 145 | 0.267 | 0.548 | 0.333        | 0.196 | 0.295 | 0.385 | 0.404 | 0.260 | 0.500 | 0.500 |
| 147 | -     | -     | -            | -     | 0.068 | -     | 0.038 | -     | -     | -     |
| 149 | 0.050 | -     | 0.241        | 0.125 | 0.182 | -     | -     | 0.140 | -     | -     |
| 151 | -     | -     | <b>0.019</b> | -     | -     | -     | -     | -     | -     | -     |
| 153 | -     | -     | <b>0.037</b> | -     | -     | -     | -     | -     | -     | -     |
| 154 | -     | -     | <b>0.019</b> | -     | -     | -     | -     | -     | -     | -     |
| 157 | -     | 0.048 | 0.037        | -     | -     | -     | -     | -     | -     | -     |

---

|              |              |       |              |       |              |       |       |              |       |       |
|--------------|--------------|-------|--------------|-------|--------------|-------|-------|--------------|-------|-------|
| 159          | 0.067        | 0.167 | 0.074        | 0.107 | 0.091        | 0.269 | 0.038 | 0.060        | 0.196 | -     |
| 161          | 0.283        | 0.167 | -            | 0.196 | 0.205        | 0.308 | 0.038 | 0.120        | 0.130 | 0.094 |
| 162          | -            | 0.048 | -            | -     | -            | -     | -     | 0.020        | -     | -     |
| 163          | -            | -     | -            | -     | -            | -     | -     | <b>0.040</b> | -     | -     |
| 169          | -            | -     | 0.056        | -     | -            | -     | 0.058 | -            | -     | -     |
| <b>cal_g</b> |              |       |              |       |              |       |       |              |       |       |
| 178          | -            | 0.022 | -            | 0.033 | -            | -     | 0.019 | 0.033        | 0.022 | -     |
| 179          | -            | -     | <b>0.077</b> | -     | -            | -     | -     | -            | -     | -     |
| 183          | -            | -     | <b>0.019</b> | -     | -            | -     | -     | -            | -     | -     |
| 184          | -            | -     | 0.038        | 0.067 | 0.034        | -     | 0.037 | 0.033        | -     | 0.059 |
| 186          | 0.086        | 0.022 | 0.077        | 0.067 | 0.103        | -     | 0.074 | 0.033        | -     | -     |
| 188          | 0.052        | 0.196 | 0.481        | 0.017 | 0.034        | -     | 0.130 | 0.083        | 0.109 | 0.441 |
| 190          | 0.138        | -     | -            | 0.033 | -            | -     | 0.019 | 0.017        | -     | -     |
| 192          | 0.172        | -     | -            | 0.033 | 0.017        | 0.269 | 0.222 | 0.050        | 0.478 | 0.235 |
| 194          | 0.086        | -     | -            | 0.067 | 0.017        | -     | 0.019 | 0.067        | -     | -     |
| 196          | -            | 0.217 | 0.058        | 0.267 | 0.069        | 0.231 | 0.074 | 0.167        | -     | 0.118 |
| 200          | -            | -     | -            | 0.050 | -            | 0.308 | -     | 0.050        | -     | -     |
| 202          | 0.155        | -     | -            | 0.100 | 0.224        | -     | 0.148 | 0.117        | 0.087 | 0.147 |
| 204          | -            | -     | -            | 0.050 | -            | -     | -     | 0.017        | -     | -     |
| 210          | 0.103        | 0.022 | -            | 0.017 | -            | -     | 0.019 | -            | -     | -     |
| 212          | 0.069        | 0.174 | -            | 0.067 | 0.069        | 0.038 | 0.019 | 0.067        | 0.022 | -     |
| 213          | -            | -     | -            | -     | <b>0.034</b> | -     | -     | -            | -     | -     |
| 214          | 0.034        | 0.348 | 0.058        | 0.083 | 0.190        | 0.038 | 0.185 | 0.233        | 0.152 | -     |
| 216          | -            | -     | 0.058        | -     | 0.103        | -     | 0.019 | 0.017        | 0.130 | -     |
| 218          | -            | -     | -            | -     | 0.034        | -     | -     | 0.017        | -     | -     |
| 220          | -            | -     | <b>0.038</b> | -     | -            | -     | -     | -            | -     | -     |
| 221          | -            | -     | <b>0.019</b> | -     | -            | -     | -     | -            | -     | -     |
| 224          | -            | -     | 0.038        | 0.017 | 0.017        | -     | -     | -            | -     | -     |
| 230          | -            | -     | 0.019        | -     | 0.052        | -     | -     | -            | -     | -     |
| 232          | 0.017        | -     | 0.019        | -     | -            | 0.038 | -     | -            | -     | -     |
| 234          | <b>0.034</b> | -     | -            | -     | -            | -     | -     | -            | -     | -     |
| 236          | 0.052        | -     | -            | 0.033 | -            | 0.038 | -     | -            | -     | -     |

---

|              |              |       |              |              |              |              |              |              |              |              |
|--------------|--------------|-------|--------------|--------------|--------------|--------------|--------------|--------------|--------------|--------------|
| 238          | -            | -     | -            | -            | -            | <b>0.038</b> | -            | -            | -            | -            |
| 262          | -            | -     | -            | -            | -            | -            | <b>0.019</b> | -            | -            | -            |
| <b>cal_h</b> |              |       |              |              |              |              |              |              |              |              |
| 245          | -            | -     | -            | -            | 0.058        | -            | -            | -            | -            | 0.071        |
| 247          | -            | -     | 0.020        | 0.037        | -            | -            | 0.059        | -            | 0.043        | -            |
| 248          | -            | -     | -            | -            | -            | -            | -            | -            | <b>0.022</b> | -            |
| 249          | -            | -     | <b>0.020</b> | -            | -            | -            | -            | -            | -            | -            |
| 253          | -            | -     | -            | <b>0.019</b> | -            | -            | -            | -            | -            | -            |
| 254          | -            | -     | -            | -            | -            | -            | -            | -            | -            | <b>0.071</b> |
| 255          | -            | -     | -            | -            | -            | -            | -            | -            | -            | <b>0.214</b> |
| 256          | -            | -     | 0.040        | 0.019        | -            | -            | 0.059        | 0.023        | -            | -            |
| 258          | 0.138        | 0.100 | -            | 0.074        | 0.154        | 0.308        | 0.118        | 0.136        | 0.609        | 0.107        |
| 259          | -            | -     | -            | -            | -            | -            | -            | <b>0.023</b> | -            | -            |
| 261          | -            | -     | 0.020        | 0.056        | -            | -            | 0.118        | -            | -            | -            |
| 262          | -            | -     | 0.020        | 0.019        | -            | -            | 0.059        | -            | 0.043        | -            |
| 263          | 0.086        | 0.125 | 0.680        | 0.185        | 0.058        | -            | 0.235        | 0.091        | 0.022        | 0.393        |
| 264          | -            | -     | 0.020        | 0.037        | 0.038        | -            | -            | 0.023        | -            | -            |
| 265          | -            | -     | -            | -            | -            | -            | -            | -            | -            | <b>0.036</b> |
| 266          | <b>0.086</b> | -     | -            | -            | -            | -            | -            | -            | -            | -            |
| 267          | -            | 0.275 | -            | 0.037        | -            | 0.192        | 0.059        | 0.045        | -            | -            |
| 268          | -            | 0.125 | -            | -            | 0.019        | -            | 0.059        | -            | -            | -            |
| 269          | 0.086        | 0.025 | 0.120        | 0.056        | 0.019        | -            | -            | 0.023        | -            | -            |
| 270          | -            | -     | -            | -            | -            | -            | -            | <b>0.023</b> | -            | -            |
| 271          | -            | 0.150 | -            | 0.074        | 0.135        | 0.154        | 0.029        | 0.159        | -            | -            |
| 272          | 0.052        | 0.075 | -            | 0.074        | 0.115        | 0.115        | -            | 0.068        | -            | -            |
| 273          | -            | 0.025 | -            | 0.019        | -            | -            | 0.029        | 0.068        | -            | 0.036        |
| 279          | 0.069        | -     | -            | 0.056        | 0.058        | -            | -            | -            | -            | -            |
| 289          | -            | -     | -            | -            | <b>0.038</b> | -            | -            | -            | -            | -            |
| 291          | <b>0.034</b> | -     | -            | -            | -            | -            | -            | -            | -            | -            |
| 293          | -            | -     | -            | 0.019        | -            | -            | 0.059        | -            | 0.022        | -            |
| 295          | -            | -     | -            | -            | -            | -            | -            | 0.023        | 0.022        | -            |
| 297          | -            | -     | -            | 0.111        | -            | -            | 0.059        | 0.068        | -            | -            |

---

|              |       |              |              |              |       |              |              |       |              |              |
|--------------|-------|--------------|--------------|--------------|-------|--------------|--------------|-------|--------------|--------------|
| <b>299</b>   | -     | -            | -            | -            | -     | -            | -            | -     | <b>0.087</b> | -            |
| <b>300</b>   | -     | -            | -            | -            | -     | 0.077        | -            | -     | 0.065        | -            |
| <b>301</b>   | 0.069 | 0.025        | -            | 0.019        | -     | 0.115        | -            | 0.045 | -            | -            |
| <b>302</b>   | -     | -            | -            | -            | -     | <b>0.038</b> | -            | -     | -            | -            |
| <b>303</b>   | 0.017 | -            | 0.040        | -            | 0.058 | -            | 0.029        | -     | 0.065        | 0.071        |
| <b>304</b>   | -     | 0.025        | -            | 0.037        | -     | -            | -            | 0.045 | -            | -            |
| <b>314</b>   | -     | -            | -            | -            | 0.058 | -            | -            | 0.068 | -            | -            |
| <b>317</b>   | -     | -            | <b>0.020</b> | -            | -     | -            | -            | -     | -            | -            |
| <b>320</b>   | -     | 0.050        | -            | -            | -     | -            | -            | 0.023 | -            | -            |
| <b>321</b>   | -     | -            | -            | -            | 0.019 | -            | -            | 0.045 | -            | -            |
| <b>326</b>   | -     | -            | -            | -            | 0.038 | -            | -            | -     | -            | -            |
| <b>340</b>   | -     | -            | -            | -            | 0.038 | -            | -            | -     | -            | -            |
| <b>341</b>   | 0.362 | -            | -            | -            | 0.077 | -            | -            | -     | -            | -            |
| <b>346</b>   | -     | -            | -            | -            | -     | -            | <b>0.029</b> | -     | -            | -            |
| <b>350</b>   | -     | -            | -            | 0.037        | 0.019 | -            | -            | -     | -            | -            |
| <b>352</b>   | -     | -            | -            | <b>0.019</b> | -     | -            | -            | -     | -            | -            |
| <b>cal_j</b> |       |              |              |              |       |              |              |       |              |              |
| <b>130</b>   | 0.317 | 0.065        | 0.037        | 0.037        | 0.017 | -            | 0.017        | 0.138 | 0.040        | 0.406        |
| <b>140</b>   | -     | -            | -            | -            | -     | -            | -            | -     | -            | <b>0.031</b> |
| <b>144</b>   | 0.067 | 0.087        | 0.093        | 0.074        | 0.034 | -            | 0.017        | 0.086 | -            | -            |
| <b>146</b>   | -     | <b>0.022</b> | -            | -            | -     | -            | -            | -     | -            | -            |
| <b>148</b>   | 0.250 | 0.326        | 0.241        | 0.241        | 0.500 | 0.231        | 0.293        | 0.241 | 0.300        | 0.312        |
| <b>150</b>   | 0.317 | 0.196        | 0.222        | 0.111        | 0.190 | 0.423        | 0.190        | 0.241 | 0.180        | 0.031        |
| <b>152</b>   | -     | 0.043        | 0.056        | -            | -     | 0.038        | 0.052        | 0.017 | -            | -            |
| <b>154</b>   | -     | -            | 0.204        | 0.130        | 0.086 | -            | 0.103        | 0.034 | 0.100        | 0.062        |
| <b>158</b>   | -     | 0.022        | 0.111        | 0.037        | -     | -            | 0.086        | 0.017 | -            | -            |
| <b>160</b>   | -     | 0.174        | 0.037        | 0.222        | 0.069 | 0.077        | 0.121        | 0.121 | 0.340        | 0.031        |
| <b>164</b>   | -     | 0.022        | -            | -            | -     | -            | 0.017        | -     | -            | -            |
| <b>166</b>   | 0.050 | 0.043        | -            | 0.130        | 0.103 | 0.231        | 0.086        | 0.103 | -            | 0.125        |
| <b>168</b>   | -     | -            | -            | 0.019        | -     | -            | 0.017        | -     | 0.040        | -            |

---
