# Supplementary material for: High genetic diversity, phenotypic plasticity, and invasive potential of a recently introduced calcareous sponge, fast spreading across the Atlanto-Mediterranean basin
Source: PubMed Central journal article supplement (PMC4851981; doi:10.1007/s00227-016-2862-6), 2016-04-30
Supplement: 227_2016_2862_MOESM2_ESM.pdf [file 227_2016_2862_MOESM2_ESM.pdf]

**High genetic diversity, phenotypic plasticity, and invasive potential of a recently introduced calcareous sponge, fast spreading across the Atlanto-Mediterranean basin.**

Magdalena Guardiola<sup>1</sup>, Johanna Frotscher<sup>2</sup>, Maria-J. Uriz<sup>1\*</sup>

<sup>1</sup> Centre d'Estudis Avançats de Blanes (CEAB-CSIC). Accés Cala St Francesc, 14. 17300 Blanes, Girona, Spain

<sup>2</sup> Geisenheim University, Department of Grape Breeding, 65366 Geisenheim, Germany

\* Corresponding author: iosune@ceab.csic.es

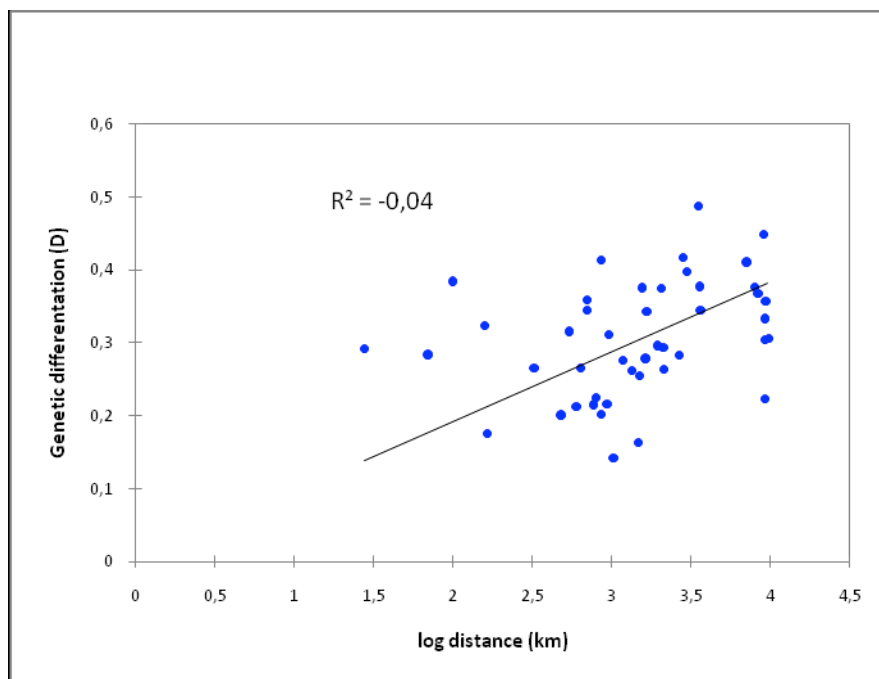

Figure 1S. Isolation by distance inferred using the Mantel test ( $r=0.337$ ,  $p=0.025$ ). A trend line is drawn.
